# Supplementary material for: Synthesis, DFT Analyses, Antiproliferative Activity, and Molecular Docking Studies of Curcumin Analogues
Source: MDPI journal article supplement (doi:10.3390/plants11212835), 2022-10-25
Supplement: s1 [file s1]

## SUPPLEMENTARY INFORMATION

### Characterization of compounds (3a-c)

*3,5-Bis(4-hydroxy-3-methylstyryl)-N-(2-methoxyphenyl)-1H-pyrazole-1-carboxamide (3a)* Yield 82%; Brown solid (EtOH), mp 150-152 °C; yield 78%; IR (KBr)  $\nu_{\max}$ : 3427 (OH), 3299 (NH), 1650 (C=O), 1544 (C=N), 1355 (O-CH<sub>3</sub>) cm<sup>-1</sup>. <sup>1</sup>H NMR (400 MHz, DMSO-*d*<sub>6</sub>):  $\delta$  ppm 3.69 (3H, s, OCH<sub>3</sub>), 3.83 (6H, s, OCH<sub>3</sub>), 4.62 (2H, s, CH<sub>2</sub>), 6.61 (1H, s, CH=C), 6.73 (2H, d, *J* = 12.4 Hz, CH and CH), 6.75 (2H, d, *J* = 12.4 Hz, CH and CH), 6.80-7.13 (10H, m, ArH), 9.14 (1H, s, ArOH), 9.56 (1H, s, ArOH), 10.56 (1H, s, CONH); <sup>13</sup>C NMR (100 MHz, DMSO-*d*<sub>6</sub>):  $\delta$  ppm 162.91, 156.81, 151.32, 147.21, 144.93, 133.22, 133.41, 128.81, 128.03, 123.60, 120.09, 122.68, 116.82, 114.07, 107.73, 56.24; EIMS *m/z* = 514.1 [M+1]<sup>+</sup>.

*3,5-Bis(4-hydroxy-3-methoxystyryl)-1H-pyrazole-1-yl-(phenoxy)ethanone (3b)* Yield, 80%; Light brown solid, mp 140-142 °C; IR (KBr)  $\nu_{\max}$ : 3431 (OH), 1600 (C=O), 1548 (C=N), 1514 (C=C), 1280 (C-O) cm<sup>-1</sup>. <sup>1</sup>H NMR (400 MHz, DMSO-*d*<sub>6</sub>):  $\delta$  ppm 3.83 (6H, s, OCH<sub>3</sub>), 4.60 (2H, s, CH<sub>2</sub>), 6.61 (1H, s, CH=C), 6.75 (2H, d, *J* = 14.2 Hz, CH and CH), 6.77 (2H, d, *J* = 14.4 Hz, CH and CH), 6.83-7.56 (11H, m, ArH), 9.14 (1H, s, ArOH), 9.64 (1H, s, ArOH); <sup>13</sup>C NMR (100 MHz, DMSO-*d*<sub>6</sub>):  $\delta$  ppm 160.71, 151.32, 147.46, 144.89, 137.31, 133.41, 129.83, 128.81, 123.6, 121.18, 120.19, 116.80, 114.31, 112.101, 107.72, 72.09, 56.41; EIMS *m/z* = 499.51 [M+1]<sup>+</sup>.

*3,5-Bis(4-hydroxy-3-methoxystyryl)-1H-pyrazole-1-yl-(2,4-dichlorophenoxy)ethanone (3c)* Yield 78%; Light yellow solid, mp 102-104 °C; yield 74%; IR (KBr)  $\nu_{\max}$ : 3427 (OH), 1610 (C=O), 1585 (C=N), 1548 (C=C), 1276 (C-O), 680 (C-Cl) cm<sup>-1</sup>. <sup>1</sup>H NMR (400 MHz, DMSO-*d*<sub>6</sub>):  $\delta$  ppm 3.82 (6H, s, OCH<sub>3</sub>), 4.80 (2H, s, CH<sub>2</sub>), 6.61 (1H, s, CH=C), 6.75 (2H, d, *J* = 14.4 Hz, CH and CH), 6.77 (2H, d, *J* = 14.4 Hz, CH and CH), 6.91-7.59 (9H, m, ArH), 9.15 (1H, s, ArOH), 9.91 (1H, s, ArOH); <sup>13</sup>C NMR (100 MHz, DMSO-*d*<sub>6</sub>):  $\delta$  ppm 162.71, 152.81, 151.32, 147.21, 144.89, 133.41, 133.01, 128.81, 128.03, 124.60, 120.18, 117.13, 116.81, 112.01, 107.71, 72.24, 56.25; EIMS *m/z* = 567.41 [M]<sup>+</sup>, 569.4 [M+2]<sup>+</sup>.

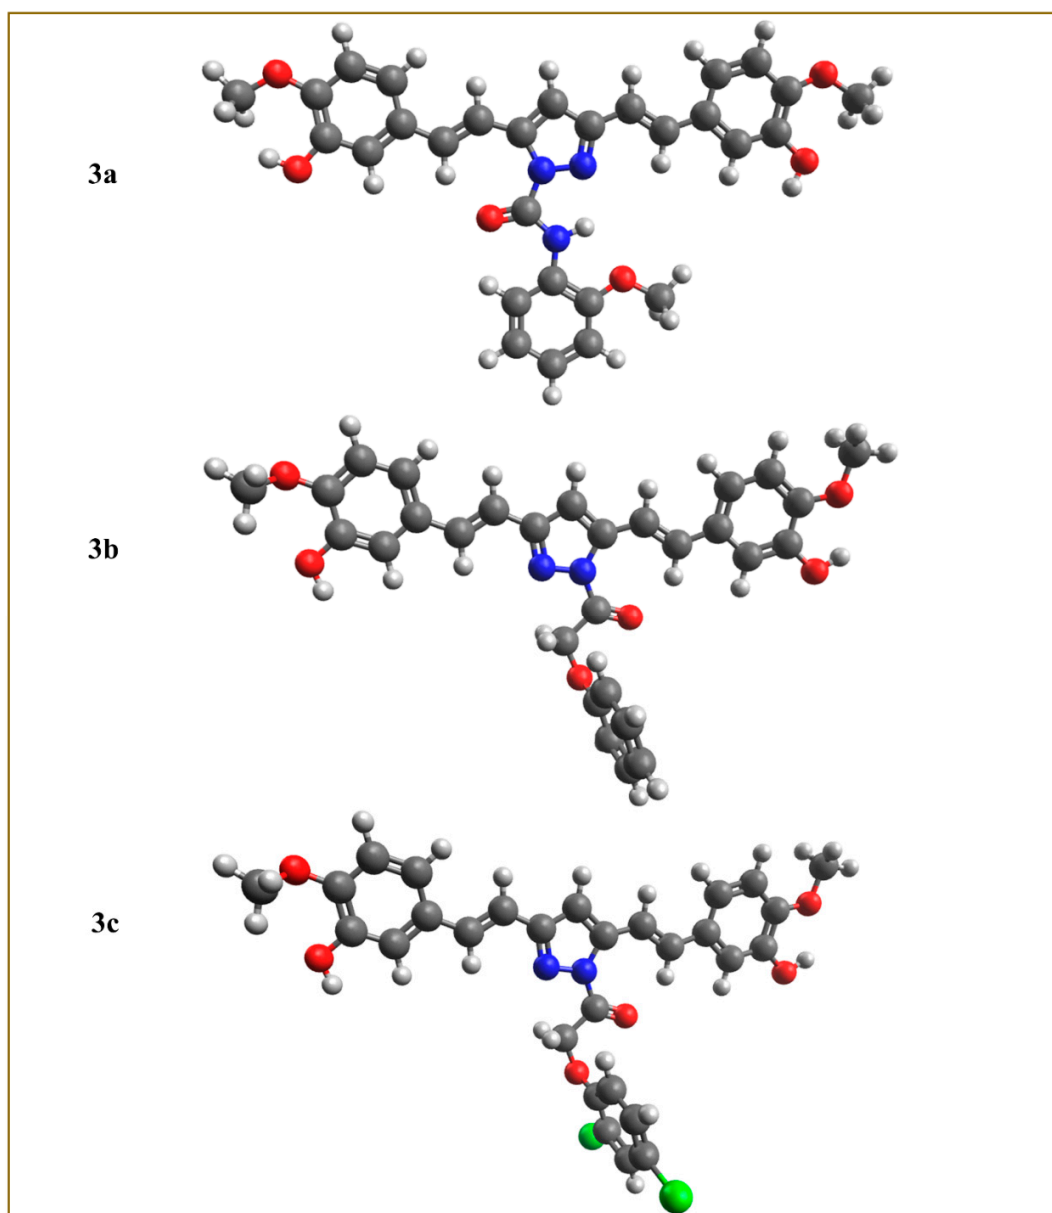

**Figure S1.** The DFT-optimized conformations of the compounds **3a–c**.

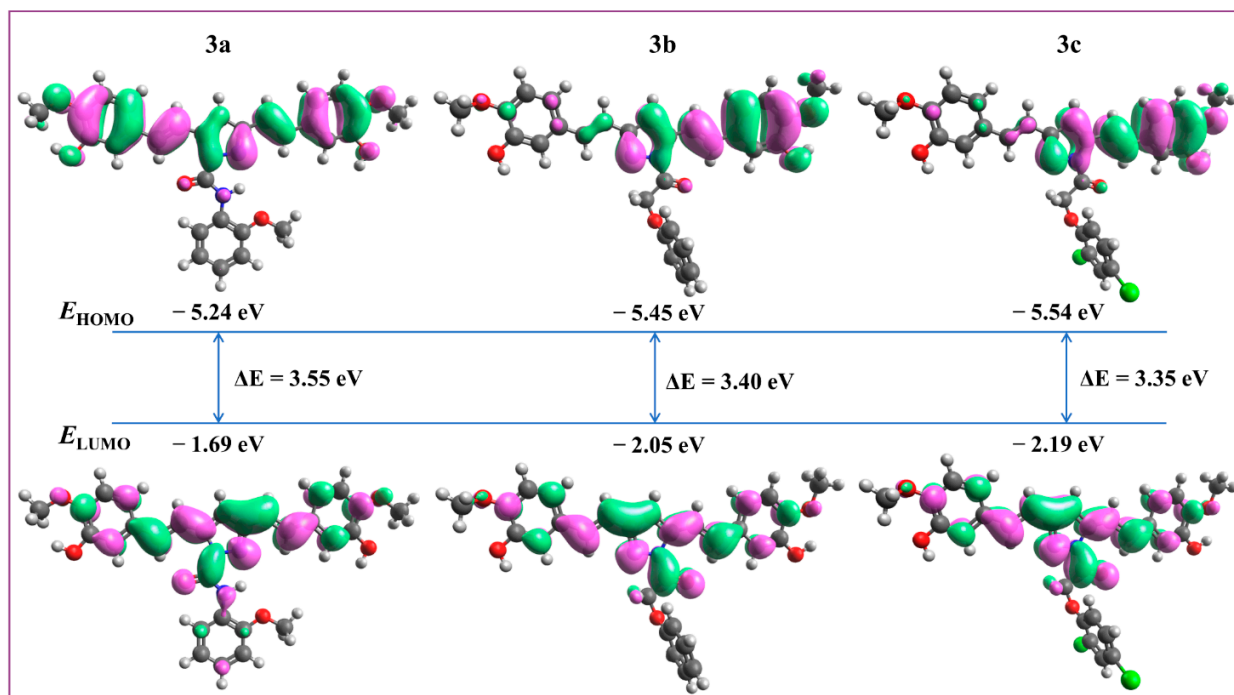

**Figure S2.** Visualization of HOMO/LUMO of compounds 3a-c.

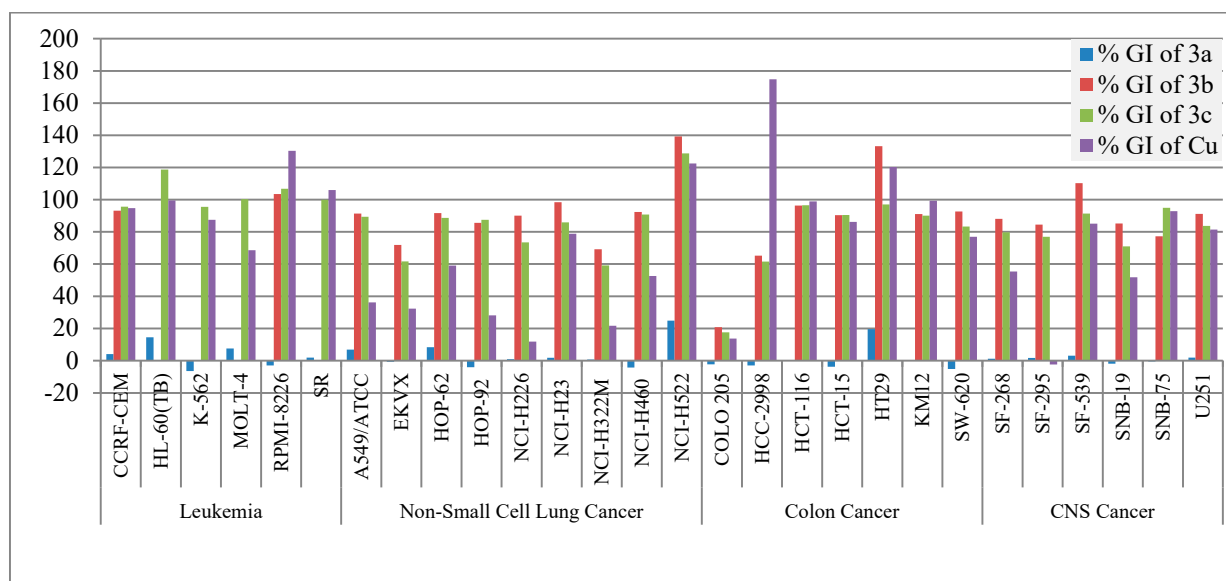

**Figure S3.** The comparative %GIs of curcumin analogues (3a-c) and curcumin (Cu) against leukemia, non-small lung cancer, colon and CNS cancer panels at 10  $\mu\text{M}$ .

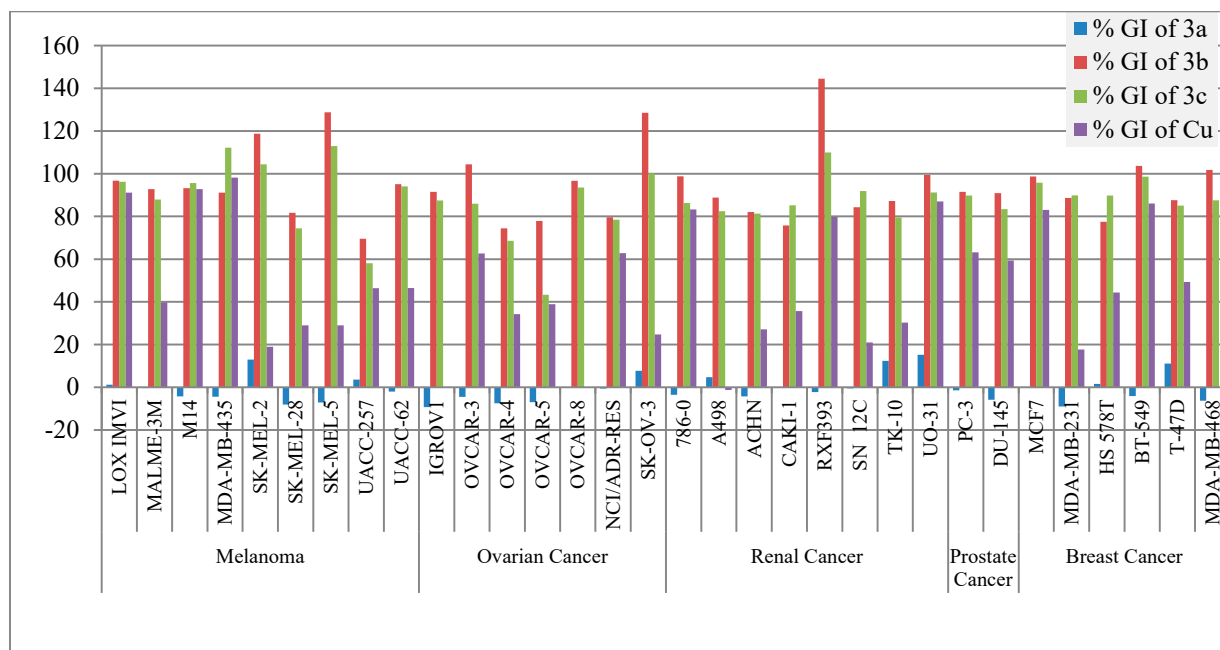

**Figure S4.** The comparative %GIs of curcumin analogues (**3a-c**) and curcumin (**Cu**) against melanoma, ovarian, renal, prostate and breast cancer panels at 10  $\mu$ M.

**Table S1:** 59 NCI cancer cell lines based antiproliferative activity of curcumin analogues **3a-c** in single dose (10  $\mu$ M) and 5-dose assay (0.001-100  $\mu$ M) of curcumin analogues **3b-c**.

| Panel                      | Cell line | One dose assay (10 $\mu$ M) |        |        | Five dose assay |                  |       |                  |
|----------------------------|-----------|-----------------------------|--------|--------|-----------------|------------------|-------|------------------|
|                            |           | 3a                          | 3b     | 3c     | 3b              |                  | 3c    |                  |
|                            |           | GP                          | GP     | GP     | TGI             | LC <sub>50</sub> | TGI   | LC <sub>50</sub> |
| Leukemia                   | CCRF-CEM  | 95.87                       | 6.79   | 4.35   | 1.34            | >100             | >100  | >100             |
|                            | HL-60(TB) | 85.39                       | -      | -18.70 | 0.901           | >100             | 1.31  | >100             |
|                            | K-562     | 106.41                      | -      | 4.41   | 1.08            | >100             | >100  | >100             |
|                            | MOLT-4    | 92.36                       | -      | -0.33  | 3.26            | >100             | 3.46  | >100             |
|                            | RPMI-8226 | 102.92                      | -3.54  | -6.80  | 2.36            | >100             | 7.62  | >100             |
|                            | SR        | 98.12                       | -      | 0.01   | 2.46            | >100             | -     | >100             |
| Non-Small Cell Lung Cancer | A549/ATCC | 93.11                       | 8.68   | 10.58  | 11.1            | 47.2             | 10.3  | 54.2             |
|                            | EKVX      | 100.71                      | 28.12  | 38.35  | 10.3            | 32.4             | 9.72  | 36.2             |
|                            | HOP-62    | 91.63                       | 8.39   | 11.28  | 4.95            | 33.3             | 3.16  | 26.7             |
|                            | HOP-92    | 104.08                      | 14.37  | 12.55  | 20.4            | >100             | 7.94  | 36.5             |
|                            | NCI-H226  | 99.06                       | 9.96   | 26.52  | 9.94            | >100             | 10.2  | >100             |
|                            | NCI-H23   | 98.21                       | 1.60   | 14.08  | 6.64            | >100             | 5.00  | >100             |
|                            | NCI-H322M | 99.22                       | 30.84  | 40.82  | 10.3            | 46.2             | 11.3  | 56.0             |
|                            | NCI-H460  | 104.28                      | 7.60   | 9.28   | 10.2            | 49.2             | 14.2  | >100             |
|                            | NCI-H522  | 73.19                       | -39.28 | -28.71 | 0.97            | 10.8             | 0.837 | 24.9             |

|                       |             |        |        |        |       |      |      |      |
|-----------------------|-------------|--------|--------|--------|-------|------|------|------|
| <i>Colon Cancer</i>   | COLO 205    | 102.26 | 79.25  | 82.37  | 3.95  | 7.94 | 4.01 | 8.12 |
|                       | HCC-2998    | 102.95 | 34.76  | 38.48  | 10.2  | 32.0 | 12.4 | 37.5 |
|                       | HCT-116     | -      | 3.68   | 3.48   | 10    | >100 | 6.21 | 53.1 |
|                       | HCT-15      | 103.77 | 9.64   | 9.52   | 7.96  | 35.1 | 3.61 | 53.8 |
|                       | HT29        | 80.40  | -33.23 | 2.93   | 6.35  | 44.7 | 7.03 | >100 |
|                       | KM12        | 99.93  | 8.96   | 9.93   | 6.81  | 51.7 | 26.2 | >100 |
|                       | SW-620      | 105.14 | 7.35   | 16.73  | 9.02  | 82.3 | >100 | >100 |
| <i>CNS Cancer</i>     | SF-268      | 98.73  | 11.95  | 20.22  | 5.65  | 29.4 | 9.84 | >100 |
|                       | SF-295      | 98.22  | 15.50  | 23.11  | 7.70  | 38.5 | 8.87 | 41.6 |
|                       | SF-539      | 96.92  | -10.32 | 8.64   | 2.47  | 32.5 | 2.85 | 25.4 |
|                       | SNB-19      | 101.82 | 14.75  | 28.98  | 9.59  | 61.7 | 11.7 | 43.5 |
|                       | SNB-75      | 100.46 | 22.74  | 5.12   | 5.30  | 40.2 | 7.81 | >100 |
|                       | U251        | 98.12  | 8.81   | 16.31  | 5.96  | 28.0 | 6.15 | 30.8 |
| <i>Melanoma</i>       | LOX IMVI    | 98.77  | 3.23   | 3.79   | 3.29  | >100 | 3.29 | 57.1 |
|                       | MALME-3M    | 100.37 | 7.21   | 12.09  | 3.71  | 33.8 | 5.03 | 35.1 |
|                       | M14         | 104.24 | 6.75   | 4.34   | 2.68  | 28.6 | 4.83 | 35.9 |
|                       | MDA-MB-435  | 104.44 | 8.84   | -12.15 | 0.492 | 46.9 | 14.7 | >100 |
|                       | SK-MEL-2    | 87.05  | -18.73 | -4.36  | 3.56  | 23.0 | 1.54 | 34.9 |
|                       | SK-MEL-28   | 108.09 | 18.37  | 26.56  | 10.4  | >100 | 7.32 | 41.4 |
|                       | SK-MEL-5    | 107.15 | -28.80 | -12.95 | 3.52  | 16.8 | 3.03 | 15.3 |
|                       | UACC-257    | 96.54  | 30.45  | 41.91  | 7.34  | 27.3 | 7.13 | 26.8 |
|                       | UACC-62     | 102.07 | 4.88   | 5.87   | 1.27  | 8.65 | 12.0 | >100 |
| <i>Ovarian Cancer</i> | IGROV1      | 109.32 | 8.43   | 12.54  | 8.00  | >100 | 10.3 | >100 |
|                       | OVCAR-3     | 104.55 | -4.46  | 13.99  | 2.77  | >100 | -    | >100 |
|                       | OVCAR-4     | 107.52 | 25.60  | 31.42  | 12.3  | >100 | >100 | >100 |
|                       | OVCAR-5     | 106.96 | 22.11  | 56.73  | 6.81  | >100 | 8.32 | >100 |
|                       | OVCAR-8     | 100.06 | 3.26   | 6.52   | 8.57  | 35.2 | 6.09 | >100 |
|                       | NCI/ADR-RES | 100.60 | 20.44  | 21.50  | 11.7  | >100 | 21.1 | >100 |
|                       | SK-OV-3     | 92.27  | -28.58 | -0.16  | 3.45  | 7.75 | 3.43 | 9.35 |
| <i>Renal Cancer</i>   | 786-0       | 103.54 | 1.27   | 13.69  | 3.58  | 13.6 | 2.52 | 8.35 |
|                       | A498        | 95.30  | 11.17  | 17.56  | 6.49  | 21.8 | 12.0 | 35.8 |
|                       | ACHN        | 104.23 | 17.96  | 18.70  | 11.1  | >100 | 9.13 | 44.1 |
|                       | CAKI-1      | -      | 24.20  | 14.79  | 12.4  | >100 | >100 | >100 |
|                       | RXF 393     | 102.31 | -44.52 | -9.98  | 2.52  | 6.34 | 3.33 | 8.77 |
|                       | SN 12C      | 100.45 | 15.71  | 8.09   | 7.66  | >100 | 65.8 | >100 |
|                       | TK-10       | 87.62  | 12.73  | 20.52  | 10.9  | 33.0 | 8.06 | 29.2 |
|                       | UO-31       | 84.77  | 0.48   | 8.72   | 4.12  | 26.7 | 2.30 | 11.4 |
| <i>Prostate</i>       | PC-3        | 101.38 | 8.49   | 10.23  | >100  | >100 | 8.02 | >100 |

|                                                                                                                                                                                                                                                                                                                                                                                                                                                              |            |        |       |       |      |      |      |      |
|--------------------------------------------------------------------------------------------------------------------------------------------------------------------------------------------------------------------------------------------------------------------------------------------------------------------------------------------------------------------------------------------------------------------------------------------------------------|------------|--------|-------|-------|------|------|------|------|
| <i>Cancer</i>                                                                                                                                                                                                                                                                                                                                                                                                                                                | DU-145     | 105.84 | 9.09  | 16.54 | 8.06 | 29.4 | 9.94 | 32.2 |
| <i>Breast Cancer</i>                                                                                                                                                                                                                                                                                                                                                                                                                                         | MCF7       | -      | 1.30  | 4.21  | 2.83 | 4.48 | 2.33 | 94.8 |
|                                                                                                                                                                                                                                                                                                                                                                                                                                                              | MDA-MB-231 | 109.02 | 11.33 | 10.15 | 15.3 | >100 | 23.4 | >100 |
|                                                                                                                                                                                                                                                                                                                                                                                                                                                              | HS 578T    | 98.44  | 22.50 | 10.22 | 6.84 | >100 | >100 | >100 |
|                                                                                                                                                                                                                                                                                                                                                                                                                                                              | BT-549     | 104.15 | -3.68 | 1.41  | 4.03 | >100 | 3.34 | 19.2 |
|                                                                                                                                                                                                                                                                                                                                                                                                                                                              | T-47D      | 88.93  | 12.43 | 14.98 | 6.95 | 50.9 | 3.99 | >100 |
|                                                                                                                                                                                                                                                                                                                                                                                                                                                              | MDA-MB-468 | 106.31 | -1.76 | 12.50 | 7.39 | 38.5 | 5.34 | 25.3 |
| Mean                                                                                                                                                                                                                                                                                                                                                                                                                                                         |            | 99.22  | 7.59  | 12.72 |      |      |      |      |
| (-) Indicates activity not tested; <sup>a</sup> The average sensitivity of all cell lines toward the test agent in $\mu\text{M}$ ;<br><sup>b</sup> The average sensitivity of all cell lines of a particular subpanel toward the test agent in $\mu\text{M}$ ; Bold<br>font showed the good growth percent (GP) ( $\leq 32\%$ ) in one dose assay; LC <sub>50</sub> and TGI stand for 50%<br>lethal concentration, and total growth inhibition respectively. |            |        |       |       |      |      |      |      |

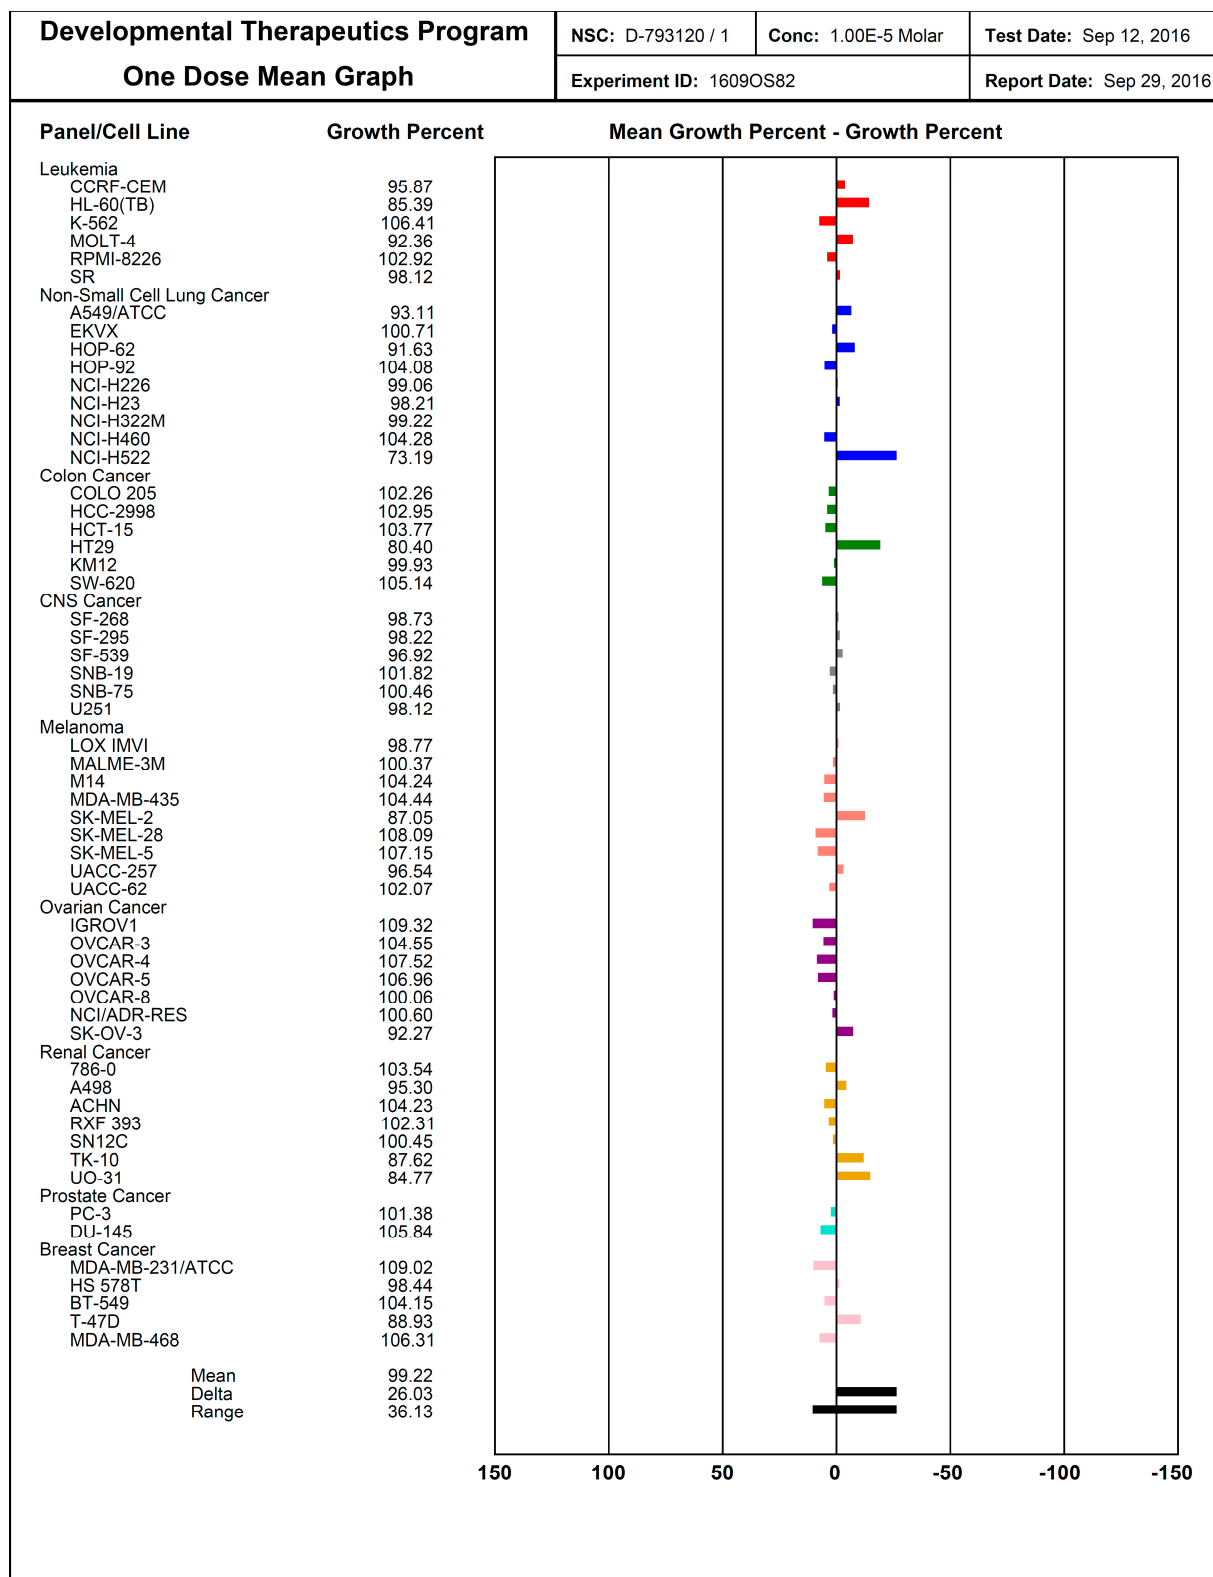

**Figure S5.** The anticancer data of compound **3a** at 10  $\mu$ M.

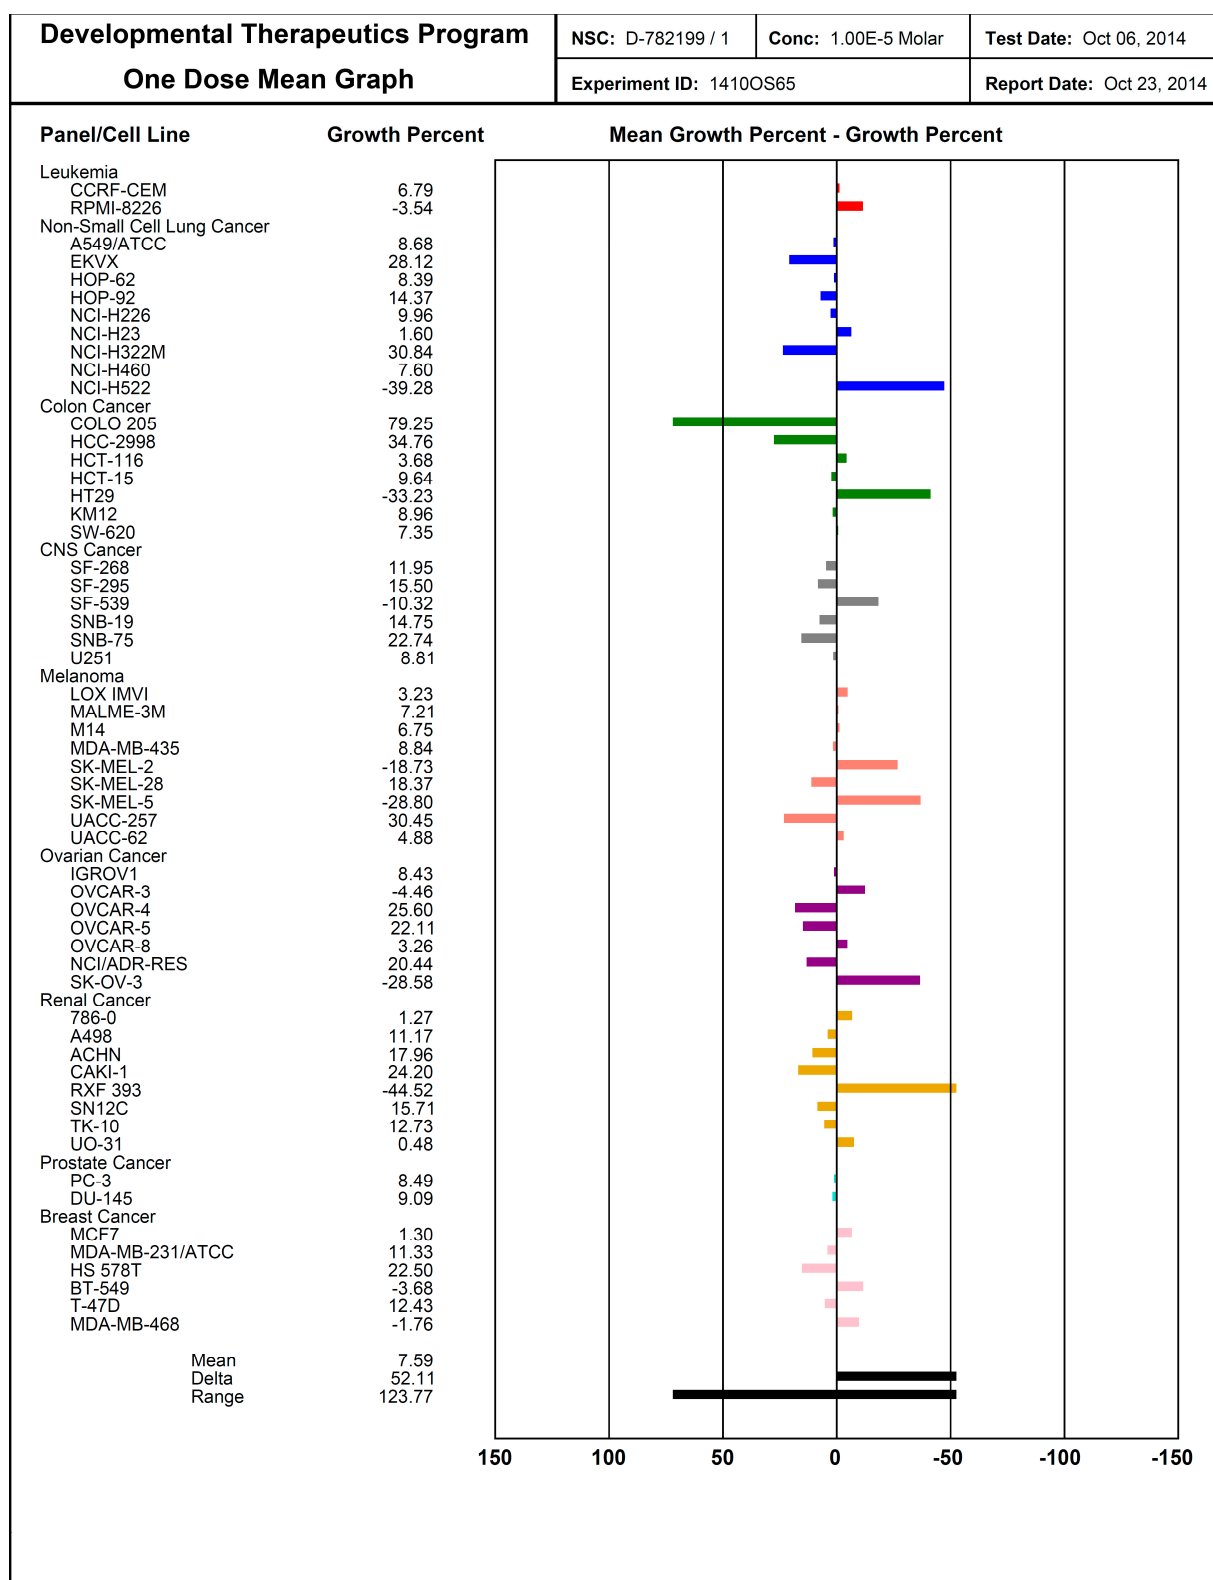



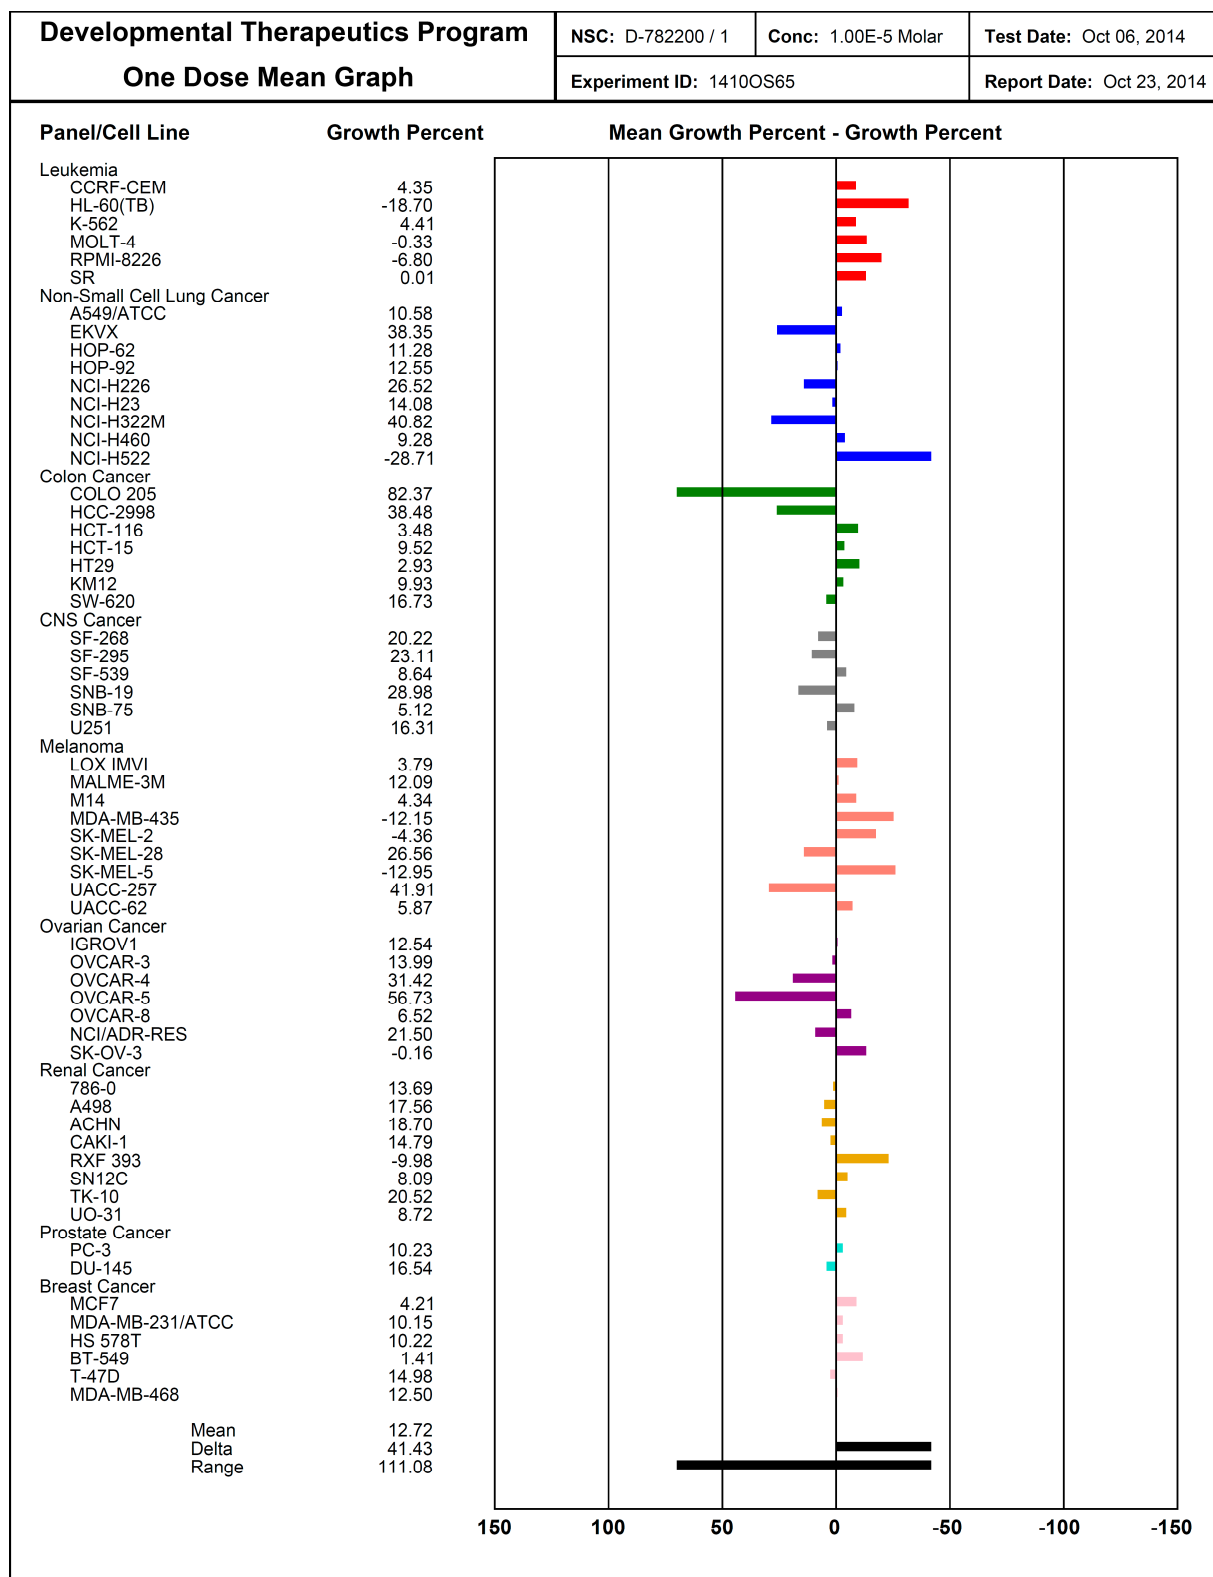

**Figure S7.** The anticancer data of compound **3c** at 10  $\mu$ M.

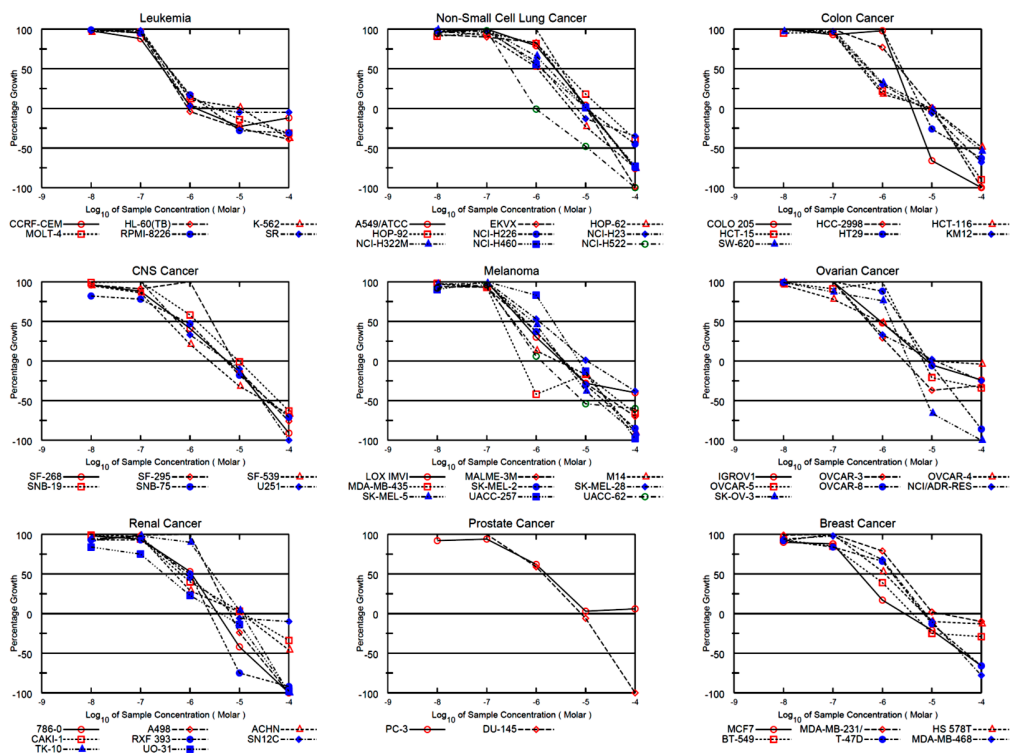

Figure S8. 60 NCI cancer cell lines based antiproliferative activity of curcumin analogue 3b.

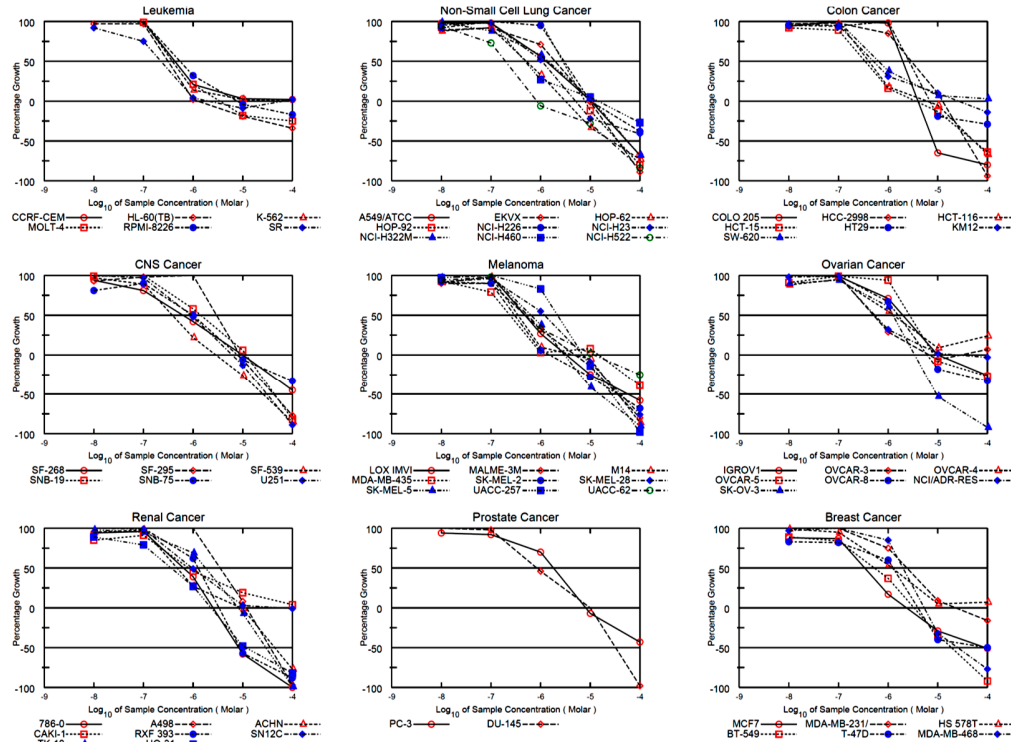

Figure S9. 60 NCI cancer cell lines based antiproliferative activity of curcumin analogue 3c.
